# Supplementary material for: Novel inhibitors are cytotoxic for myeloma cells with NFkB inducing kinase-dependent activation of NFkB
Source: PubMed Central journal article supplement (PMC4147345; doi:10.18632/oncotarget.2128), 2014-06-23
Supplement: oncotarget-05-4554-s001.pdf [file oncotarget-05-4554-s001.pdf]

**Novel inhibitors are cytotoxic for myeloma cells with NFkB inducing kinase-dependent activation of NFkB**

**Supplementary Material**

**Table S1: Summary of the KINOMEScan® survey:**

| Data set 1    |                   |                |                              |                              |                   |
|---------------|-------------------|----------------|------------------------------|------------------------------|-------------------|
| Compound Name | Selectivity Score | Number of Hits | Number of Non-Mutant Kinases | Screening Concentration (nM) | Selectivity Score |
| AM-0216#2     | Type S(35)        | 8              | 99                           | 1000                         | 0.081             |
| AM-0216#2     | S(10)             | 5              | 99                           | 1000                         | 0.051             |
| AM-0216#2     | S(1)              | 2              | 99                           | 1000                         | 0.02              |
| AM-0561#2     | S(35)             | 7              | 99                           | 1000                         | 0.071             |
| AM-0561#2     | S(10)             | 1              | 99                           | 1000                         | 0.01              |
| AM-0561#2     | S(1)              | 1              | 99                           | 1000                         | 0.01              |
| AM-0650#2     | S(35)             | 6              | 99                           | 1000                         | 0.061             |
| AM-0650#2     | S(10)             | 2              | 99                           | 1000                         | 0.02              |
| AM-0650#2     | S(1)              | 1              | 99                           | 1000                         | 0.01              |

| data set 2    |                   |                |                              |                              |                   |
|---------------|-------------------|----------------|------------------------------|------------------------------|-------------------|
| Compound Name | Selectivity Score | Number of Hits | Number of Non-Mutant Kinases | Screening Concentration (nM) | Selectivity Score |
| AM-0216#2     | Type S(35)        | 10             | 99                           | 1000                         | 0.101             |
| AM-0216#2     | S(10)             | 5              | 99                           | 1000                         | 0.051             |
| AM-0216#2     | S(1)              | 2              | 99                           | 1000                         | 0.02              |
| AM-0561#2     | S(35)             | 8              | 99                           | 1000                         | 0.081             |
| AM-0561#2     | S(10)             | 4              | 99                           | 1000                         | 0.04              |
| AM-0561#2     | S(1)              | 1              | 99                           | 1000                         | 0.01              |
| AM-           |                   |                |                              |                              |                   |

|               |              |          |           |             |              |
|---------------|--------------|----------|-----------|-------------|--------------|
| <b>0650#2</b> | <b>S(35)</b> | <b>5</b> | <b>99</b> | <b>1000</b> | <b>0.051</b> |
| <b>AM-</b>    |              |          |           |             |              |
| <b>0650#2</b> | <b>S(10)</b> | <b>2</b> | <b>99</b> | <b>1000</b> | <b>0.02</b>  |
| <b>AM-</b>    |              |          |           |             |              |
| <b>0650#2</b> | <b>S(1)</b>  | <b>1</b> | <b>99</b> | <b>1000</b> | <b>0.01</b>  |

Each experiment duplicated.

Details about these competition binding assays have been published(1, 2) and can be found on the <http://www.discoverx.com/services/drug-discovery-development-services/kinase-profiling/kinomescan> DiscoverX website.

**Table S2: The actual POC values for the kinases that show up in the various S() values.**

|           | AM-0216#2 | AM-0216#2 | AM-0650#2 | AM-0650#2 | AM-0561#2 | AM-0561#2 |
|-----------|-----------|-----------|-----------|-----------|-----------|-----------|
| CSNK1D    | 84        | 36        | 100       | 77        | 31        | 16        |
| CSNK1G2   | 52        | 29        | 100       | 96        | 90        | 69        |
| CSNK2A1   | 94        | 80        | 90        | 77        | 13        | 4.5       |
| HIPK1     | 82        | 98        | 32        | 100       | 63        | 70        |
| JNK3      | 99        | 100       | 86        | 100       | 29        | 22        |
| MAP4K4    | 1.4       | 2.6       | 30        | 32        | 36        | 43        |
| MEK3      | 70        | 57        | 80        | 74        | 52        | 27        |
| MEK5      | 15        | 20        | 7.4       | 9.1       | 14        | 15        |
| PRKD2     | 1.9       | 2.8       | 14        | 20        | 55        | 56        |
| PRKG1     | 28        | 42        | 83        | 100       | 100       | 100       |
| ROCK2     | 4.3       | 3.5       | 61        | 61        | 86        | 100       |
| TAK1      | 12        | 11        | 85        | 58        | 11        | 8.7       |
| TNIK      | 0.7       | 0.4       | 17        | 10        | 10        | 9.7       |
| TSSK1B    | 96        | 27        | 100       | 80        | 79        | 37        |
| TYK2(JH1) | 46        | 31        | 99        | 95        | 84        | 47        |
| YSK4      | 0         | 0         | 0.2       | 0.2       | 0         | 0         |
|           |           |           |           |           |           |           |
|           |           | S(35)     |           |           |           |           |
|           |           | S(10)     |           |           |           |           |
|           |           | S(1)      |           |           |           |           |

**Table S3: K<sub>i</sub> and K<sub>d</sub> ELECT of comparison kinases**

| Compound/nM | NIK Ki* | MAP4K4 | PRKD2 | ROCK2 | TAK1 | TNIK | YSK4     |
|-------------|---------|--------|-------|-------|------|------|----------|
| AMG-0216    | 2.1     | 14     | 34    | 110   | 39   | 17   | 0.2      |
| 290         | 150     | 100    | 1100  | 1400  | 170  | 10   | AMG-0650 |
| 610         | >8000   | 25     | 120   | 0.9   |      |      | 0.33     |
|             |         |        |       |       |      |      | 89       |

DiscoverX K<sub>d</sub>  
Elect  
\*NIK is not part of  
DiscoverX  
panel(3)

**Table S4: Targets covered in KINOMEScan (NIK is not part of this panel)**

| KINOMEScan             | 99 | Included                  | Targets                       |
|------------------------|----|---------------------------|-------------------------------|
| ABL1-nonphosphorylated |    | GRK1                      | PIK3CD                        |
| ABL1-phosphorylated    |    | GSK3B                     | PIM1                          |
| AKT1                   |    | HIPK1                     | PKAC-alpha                    |
| ALK                    |    | HPK1                      | PLK1                          |
| AMPK-alpha1            |    | IGF1R                     | PLK4                          |
| AURKA                  |    | INSR                      | PRKCE                         |
| BMPR1A                 |    | IRAK4                     | PRKD2                         |
| BRAF                   |    | JAK2(JH1domain-catalytic) | PRKG1                         |
| BRK                    |    | JNK3                      | PRKR                          |
| BTK                    |    | KIT                       | RIPK2                         |
| CAMK2D                 |    | LCK                       | ROCK2                         |
| CAMK4                  |    | LIMK1                     | RPS6KA5(Kin.Dom.1-N-terminal) |
| CDK2                   |    | LYN                       | RSK1(Kin.Dom.1-N-terminal)    |
| CDK4-cyclinD1          |    | MAP3K1                    | S6K1                          |
| CDK8                   |    | MAP4K4                    | SRC                           |
| CHEK1                  |    | MAPKA 2                   | STK33                         |
| CLK4                   |    | MARK1                     | SYK                           |
| CSNK1D                 |    | MEK3                      | TAK1                          |
| CSNK2A1                |    | MEK5                      | TAOK2                         |
| DAPK1                  |    | MET                       | TBK1                          |
| DDR1                   |    | MKNK1                     | TGFBR1                        |
| DMPK                   |    | MLK1                      | TGFBR2                        |
| DYRK1A                 |    | MST2                      | TIE2                          |
| EGFR                   |    | MTOR                      | TNIK                          |
| EPHA2                  |    | NEK4                      | TRKA                          |
| EPHB3                  |    | NEK6                      | TSSK1B                        |
| ERK2                   |    | OSR1                      | TTK                           |
| ERK4                   |    | p38-alpha                 | TYK2(JH1domain-catalytic)     |
| ERN1                   |    | p38-gamma                 | VEGFR2                        |
| FGFR1                  |    | PAK2                      | WEE1                          |
| FLT3                   |    | PCTK3                     | YANK2                         |
| FYN                    |    | PDGFRB                    | YSK4                          |
| GAK                    |    | PIK3CA                    | ZAK                           |

See <http://www.discoverx.com/services/drug-discovery-development-services/kinase-profiling/kinomescan> for links to codes.

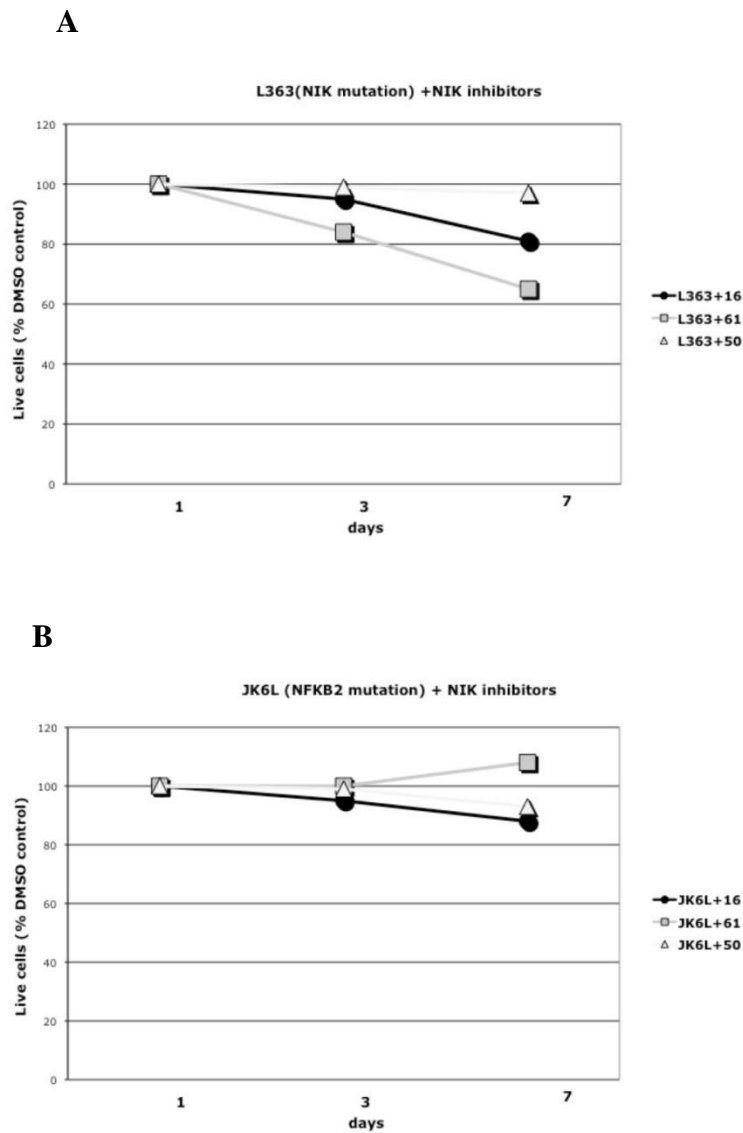

**Figure S1: NIK inhibitors can selectively decrease viability of MMCLs in which NFkB activity is NIK-dependent.** Cell lines with NIK-dependent NFkB activation: **(A)** L363 (NIK mutation) or NIK-independent NFkB activation: **(B)** JK6L (NFkB2 mutation) were cultured in the presence of 1  $\mu$ M NIK inhibitors. After 3 and 7 days, cell viability was determined by flow cytometry with the Annexin-V-FLUOS Staining Kit, and displayed relative to a control culture treated with the same amount of DMSO

**A**

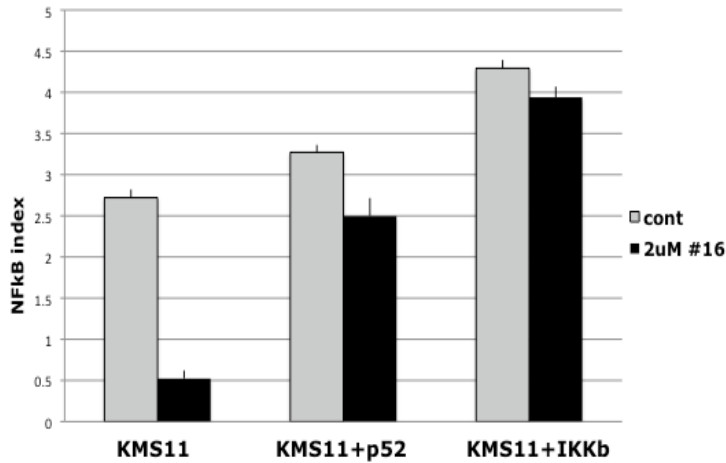

**B**

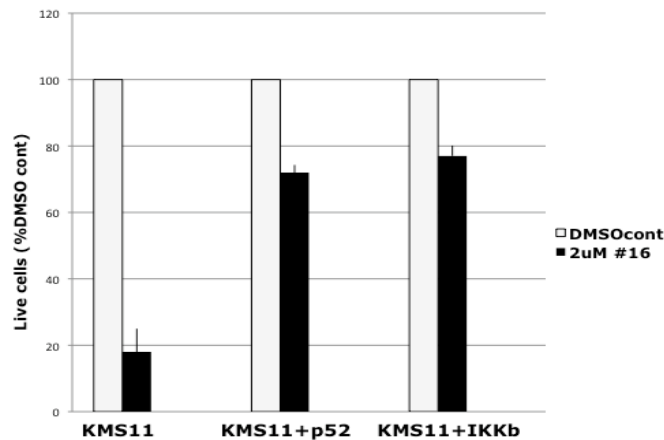

**Figure S2: NIK-independent activation of NFkB pathway can minimize the cytotoxic effect of NIK inhibitor** (A) NFkB target gene expression following inhibition of NIK activity in KMS11 cell line transfected with empty vector or constitutively active IKK $\beta$  or NFkB2 (p52) after 16 h of incubation with 2  $\mu$ M AM-0216 (Data are mean  $\pm$ SD of triplicate experiments and significance determined by a t-test). (B) KMS11 transfected with empty vector, constitutively active IKK $\beta$  or NFkB2 (p52) were cultured in the presence of 2  $\mu$ M of NIK inhibitor AM-0216. After 7 days, cell viability was determined by cell viability analysis using Trypan Blue staining, and displayed relative to a control culture treated with the same volume of DMSO.

A

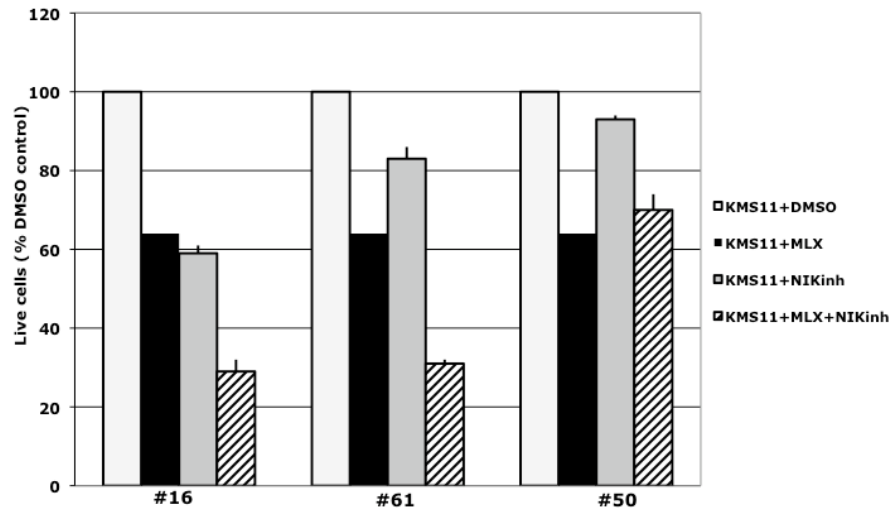

B

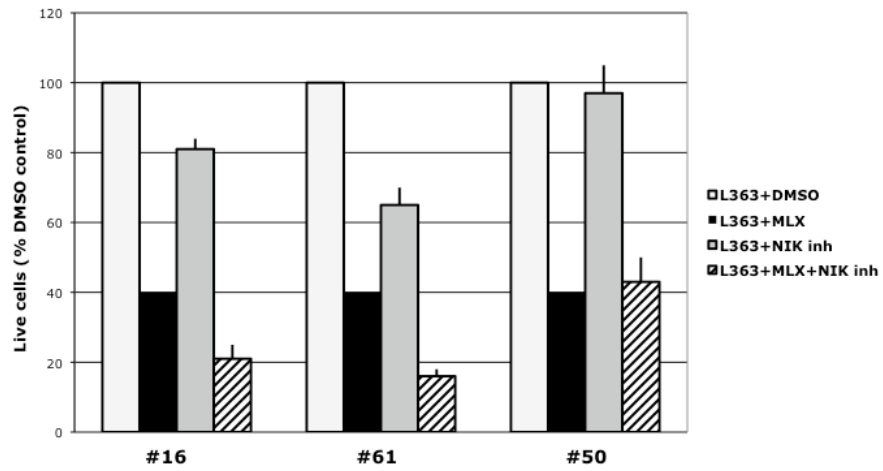

C

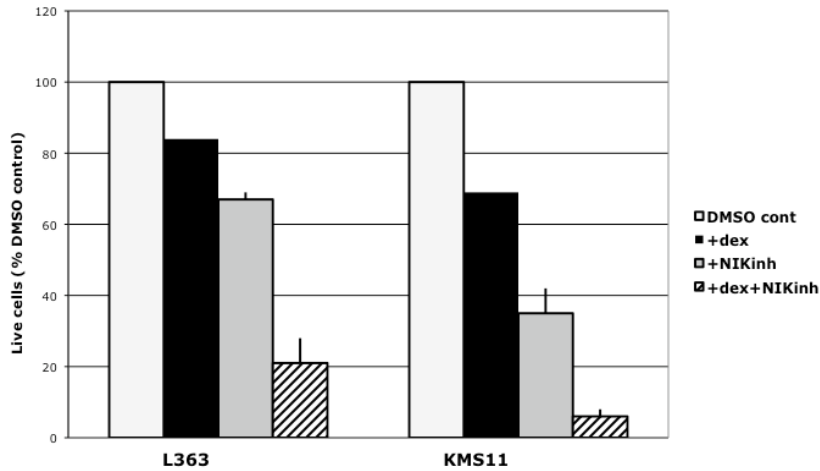

**Figure S3: Effect of combination of NIK inhibitors and IKK $\beta$  inhibitor (MLX) or dexamethasone on cell viability.** KMS11 and (B) L363 cells were cultured in the presence of 1  $\mu$ M NIK compounds\* and/or 25  $\mu$ M MLX. After 3 days for KMS11 and 7 days for L363, cell viability was determined by flow cytometry with an Annexin-V-FLUOS Staining Kit, and the results were normalized to the DMSO solvent control. \* – AM-0216 (#16), AM-0561 (#61), AM-0650 (#50). (C) KMS11 and L363 cells were cultured in the presence of 1  $\mu$ M NIK compounds AM-0561 and/or 20  $\mu$ M Dexamethasone. After 7 days cell viability was determined by flow cytometry with an Annexin-V-FLUOS Staining Kit, and the results were normalized to the DMSO solvent control (Data are mean  $\pm$ SD of triplicate experiments and significance determined by a t-test).

1. Fabian MA, Biggs WH, 3rd, Treiber DK, et al. A small molecule-kinase interaction map for clinical kinase inhibitors. *Nat Biotechnol* 2005; 23: 329-36.
2. Karaman MW, Herrgard S, Treiber DK, et al. A quantitative analysis of kinase inhibitor selectivity. *Nat Biotechnol* 2008; 26: 127-32.
3. Chen GC, T. D.; Fisher, B.; He, X.; Li, K.; Li, Z.; McGee, L. R.; Pattaropong, V.; Faulder, P.; Seganish, J. L.; Shin, Y. Alkynyl alcohols as kinase inhibitors and their preparation, pharmaceutical compositions and use in the treatment of inflammation and inflammatory disorders. WO2009158011A1. 2009.
